# Supplementary material
Source: publisher figshare collection journal article supplement (https://acs.figshare.com/ndownloader/files/4142167)
Supplement: Supplementary file 1 [file 4142167]

# Supporting Information

## Facile, Rapid and Surfactant-free Synthesis of Bimetallic Pt-Cu Nanoparticles via Ultrasound-Assisted Redox Replacement

Zhenyu Sun,<sup>a</sup> Justus Masa,<sup>b</sup> Wei Xia,<sup>a</sup> Dennis König,<sup>c</sup> Alfred Ludwig,<sup>c</sup> Zi-An Li,<sup>d</sup> Michael Farle,<sup>d</sup> Wolfgang Schuhmann,<sup>b</sup> Martin Muhler<sup>\*a</sup>

**Estimation of the number densities of Cu and Pt-Cu NPs:** Assuming a sphere model and uniformity in particle size, the number of Cu NPs per gram of NCNTs ( $N_{Cu}$ ) at a given loading ( $A$ ) can be calculated by  $A/(\rho_{Cu}V_{Cu})$ .  $\rho_{Cu}$  and  $V_{Cu}$  are the density of Cu and the volume of a single Cu particle ( $4\pi r_{Cu}^3/3$ ), respectively. Given a molar ratio of Cu-to-Pt at  $B$  in the alloy NPs, the remaining mass of Cu ( $m_{Cu}$ ) after the displacement is  $AB/(B+1)$ ; the mass of Pt ( $m_{Pt}$ ) is  $AM_{Pt}/(M_{Cu}(B+1))$ , where  $M_{Pt}$  and  $M_{Cu}$  are the molecular weight of Pt and Cu, respectively. The number of Pt-Cu NPs per gram of NCNTs ( $N_{Pt-Cu}$ ) can thus be estimated by  $(m_{Cu}+m_{Pt})/(\rho_{Pt-Cu}V_{Pt-Cu})$ , that is  $(AB/((B+1)\rho_{Pt-Cu}V_{Pt-Cu})) + (AM_{Pt}/(M_{Cu}(B+1)\rho_{Pt-Cu}V_{Pt-Cu}))$ . In cases of  $B = 1$ ,  $M_{Cu} = 64$  g mol<sup>-1</sup>,  $M_{Pt} = 195$  g mol<sup>-1</sup>, the equation can be simplified as  $2.02A/(\rho_{Pt-Cu}V_{Pt-Cu})$ . Moreover, based on the approximation of  $\rho_{Pt-Cu} \approx 2 \rho_{Cu}$  when  $B = 1$ ,  $N_{Pt-Cu}$  can be approximated as  $A/(\rho_{Cu}V_{Pt-Cu})$ . In such a scenario,  $N_{Pt-Cu}/N_{Cu} = (r_{Pt-Cu}/r_{Cu})^3$ , which is determined to be about 35 given that the diameters of Cu and Pt-Cu NPs are 9.4 and 2.89 nm, respectively.

---

<sup>a</sup> Laboratory of Industrial Chemistry, Ruhr-University Bochum D-44780, Bochum, Germany. E-mail: [muhler@techem.rub.de](mailto:muhler@techem.rub.de)

<sup>b</sup> Analytische Chemie-Elektroanalytik & Sensorik, Ruhr-University Bochum D-44780 Bochum, Germany

<sup>c</sup> Department of Mechanical Engineering, Institute for Materials, Ruhr-University Bochum D-44780 Bochum, Germany

<sup>d</sup> Fakultät für Physik and CeNIDE, Universität Duisburg-Essen, Lotharstr. 1, D- 47057 Duisburg, Germany

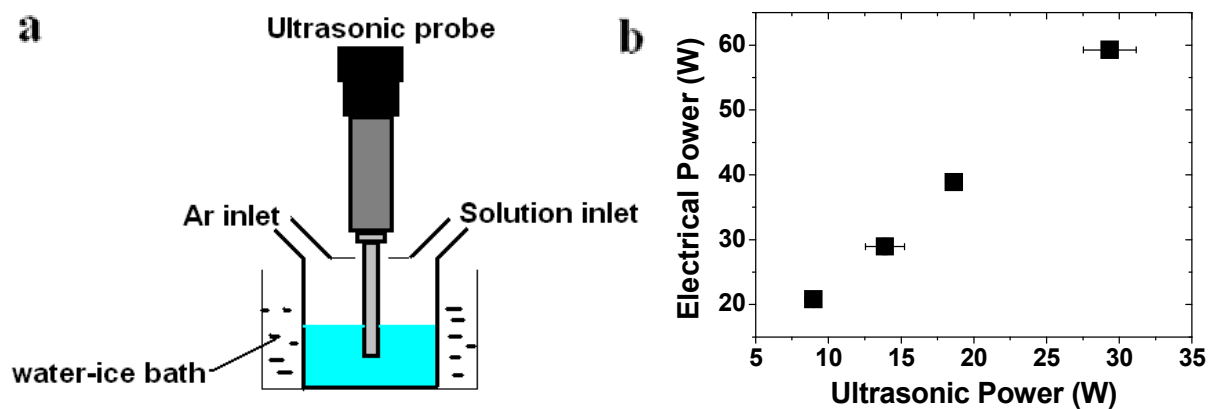

**Figure S1.** (a) Sonochemical system used in this work to prepare the metal nanoparticles. (b) Electrical power versus ultrasonic power for the system used in this work.

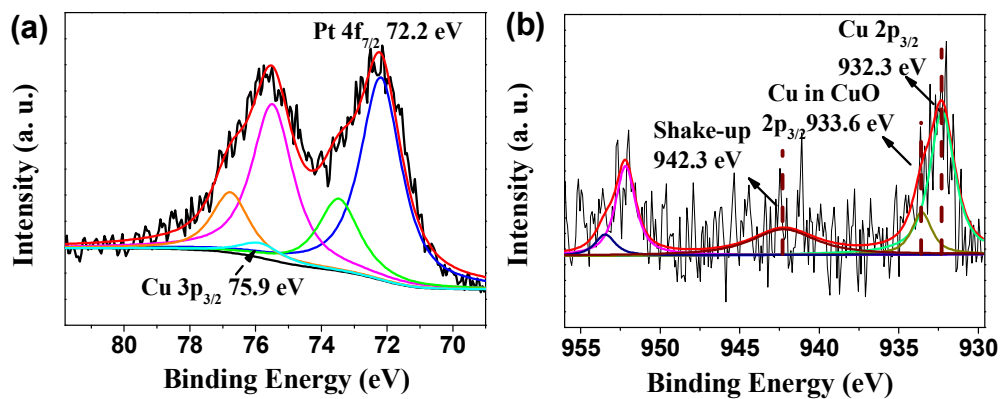

**Figure S2.** (a) Pt 4f and (b) Cu 2p core level XPS spectra of Pt-Cu/NCNT. The molar ratio of Pt:Cu in the sample is 1:1.

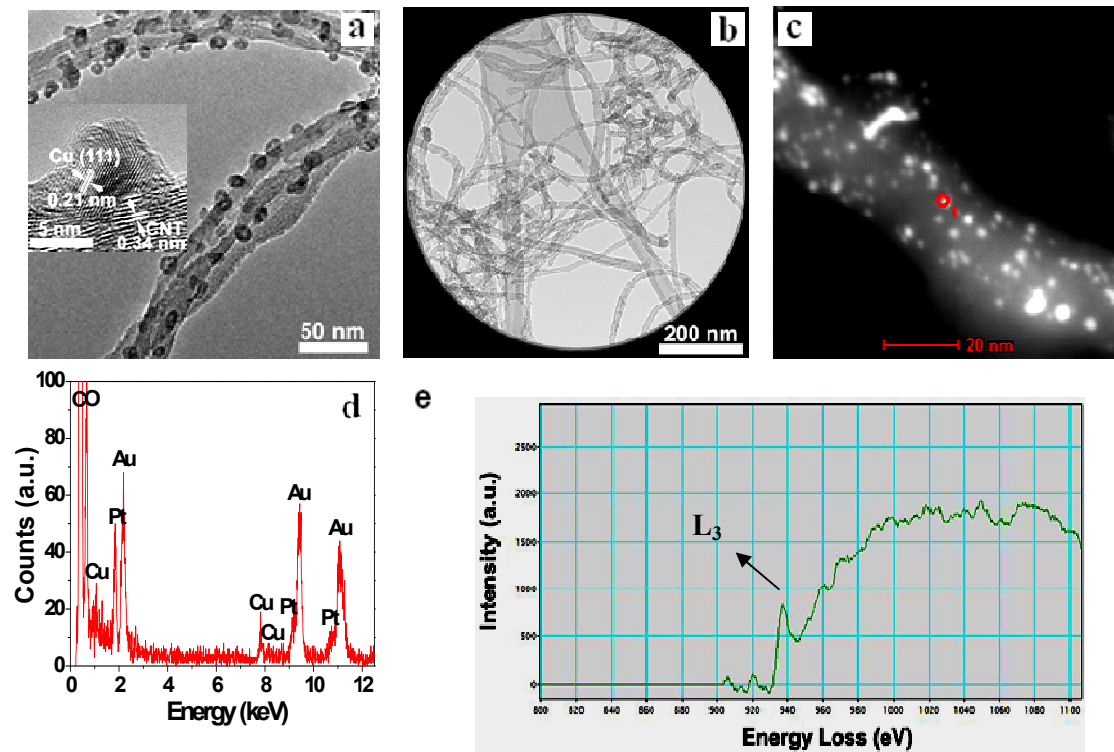

**Figure S3.** TEM images of (a) Cu/NCNTs at 7.3 wt.% of Cu loading, the inset shows HRTEM observation of the sample, (b) Pt-Cu/NCNTs, SAED pattern of the circled sample is displayed in Fig. 4e. (c) STEM image of an individual Pt-Cu/NCNT. (d) EDX pattern of the circled individual NP shown in c. The Au peaks are from the TEM grid. (e) EELS Cu spectrum.

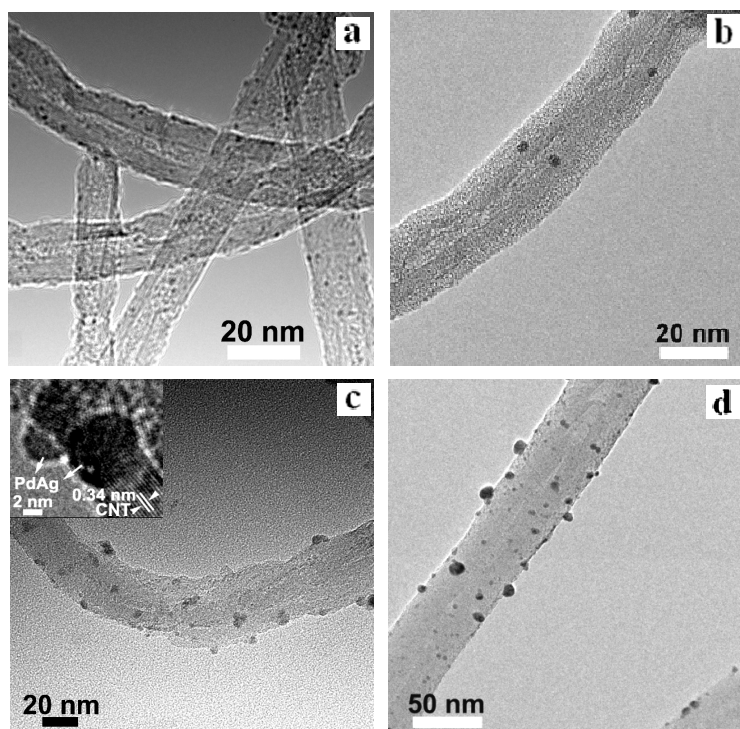

**Figure S4.** TEM images of (a) Pt-Cu/NCNTs prepared via tip sonication for 10 s, (b) Pd-Cu/NCNT, (c) Pd-Ag/NCNT and (d) Au-Pd/NCNT. The inset in c is a HRTEM image of the sample.

**Table S1.** Quantitative SEM-EDX analysis results for the Pt-Cu/NCNT shown in Figure 3

| Element | Wt. %  | At. %  | K-Ratio | Z      | A      | F      |
|---------|--------|--------|---------|--------|--------|--------|
| C K     | 52.40  | 72.76  | 0.0978  | 1.0471 | 0.1782 | 1.0001 |
| O K     | 2.13   | 2.22   | 0.0037  | 1.0295 | 0.1689 | 1.0006 |
| Al K    | 38.86  | 24.02  | 0.3089  | 0.9589 | 0.8289 | 1.0000 |
| Cu K    | 2.47   | 0.65   | 0.0214  | 0.8406 | 1.0091 | 1.0189 |
| Pt L    | 4.14   | 0.35   | 0.0277  | 0.6436 | 1.0407 | 1.0000 |
| Total   | 100.00 | 100.00 |         |        |        |        |

**Table S2.** Tafel slopes of Pt-Cu/NCNTs with varying Pt:Cu molar ratios and Pt-ETEK (20% Pt on Vulcan carbon)

| Catalyst | Tafel slopes |              |
|----------|--------------|--------------|
|          | mV / dec     | mV / dec     |
| Pt:Cu    |              |              |
| 25: 75   | 57.5 ± 4.5   | 80.5 ± 7.2   |
| 50: 50   | 88.8 ± 5.2   | 130.3 ± 13.4 |
| 75: 25   | 86.0 ± 13    | 132.2 ± 24.8 |
| Pt-ETEK  | 74.1 ± 11.4  | 134.9 ± 21.6 |
